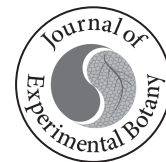

RESEARCH PAPER

# Getting ready for host invasion: elevated expression and action of xyloglucan endotransglucosylases/hydrolases in developing haustoria of the holoparasitic angiosperm *Cuscuta*

Stian Olsen<sup>1</sup>, Bernd Striberny<sup>1,\*</sup>, Julien Hollmann<sup>2</sup>, Rainer Schwacke<sup>1,†</sup>, Zoë A. Popper<sup>3</sup> and Kirsten Krause<sup>1,‡</sup>

<sup>1</sup> Department of Arctic and Marine Biology, Faculty of Biosciences, Fisheries and Economics, UiT The Arctic University of Norway, Dramsveien 201, 9037 Tromsø, Norway

<sup>2</sup> Institute of Botany, Christian-Albrechts-University of Kiel, Olshausenstrasse 40, D-24098 Kiel, Germany

<sup>3</sup> Botany and Plant Science and Ryan Institute for Environmental, Marine and Energy Research, National University of Ireland Galway, Galway, Ireland

\* Present address: ArcticZymes AS, Sykehusveien 23, 9019 Tromsø, Norway.

† Present address: Institute of Bio- and Geosciences (IBG-2: Plant Sciences), Forschungszentrum Jülich, Wilhelm-Johnen-Straße, D-52428 Jülich, Germany.

‡ To whom correspondence should be addressed. E-mail: [kirsten.krause@uit.no](mailto:kirsten.krause@uit.no)

Received 17 August 2015; Revised 14 October 2015; Accepted 15 October 2015

Editor: Christine Foyer, Leeds University, UK

## Abstract

Changes in cell walls have been previously observed in the mature infection organ, or haustorium, of the parasitic angiosperm *Cuscuta*, but are not equally well charted in young haustoria. In this study, we focused on the molecular processes in the early stages of developing haustoria; that is, before the parasite engages in a physiological contact with its host. We describe first the identification of differentially expressed genes in young haustoria whose development was induced by far-red light and tactile stimuli in the absence of a host plant by suppression subtractive hybridization. To improve sequence information and to aid in the identification of the obtained candidates, reference transcriptomes derived from two species of *Cuscuta*, *C. gronovii* and *C. reflexa*, were generated. Subsequent quantitative gene expression analysis with different tissues of *C. reflexa* revealed that among the genes that were up-regulated in young haustoria, two xyloglucan endotransglucosylase/hydrolase (XTH) genes were highly expressed almost exclusively at the onset of haustorium development. The same expression pattern was also found for the closest XTH homologues from *C. gronovii*. *In situ* assays for XTH-specific action suggested that xyloglucan endotransglucosylation was most pronounced in the cell walls of the swelling area of the haustorium facing the host plant, but was also detectable in later stages of haustoriogenesis. We propose that xyloglucan remodelling by *Cuscuta* XTHs prepares the parasite for host infection and possibly aids the invasive growth of the haustorium.

**Key words:** Cell wall, *Cuscuta*, haustorial gene expression, haustorium development, parasitic plant, xyloglucan endotransglucosylase/hydrolase (XTH).

---

Abbreviations: Cg, *Cuscuta gronovii*; Cq, quantification cycle; Cr, *Cuscuta reflexa*; FR, far-red; GH, glycoside hydrolase; GT, glycosyltransferase; PAE, pectin acetylase; PX, peroxidase; RGP, reversibly glycosylated polypeptide; RT-qPCR, reverse transcription quantitative real-time PCR; SF2, pre-mRNA splicing factor 2; SSH, suppression subtractive hybridization; XET, xyloglucan endotransglucosylation; XTH, xyloglucan endotransglucosylase/hydrolase.

© The Author 2015. Published by Oxford University Press on behalf of the Society for Experimental Biology.

This is an Open Access article distributed under the terms of the Creative Commons Attribution License (<http://creativecommons.org/licenses/by/3.0/>), which permits unrestricted reuse, distribution, and reproduction in any medium, provided the original work is properly cited.

## Introduction

The genus *Cuscuta* of the Convolvulaceae family (Solanales) includes ~200 species of thread-like parasitic plants with worldwide distribution (Dawson *et al.*, 1994; Garcia *et al.*, 2014). Being devoid of proper leaves and roots, and exhibiting very little to no photosynthetic activity, *Cuscuta* spp. are dependent on parasitizing a host plant to survive and reproduce. Host attachment and intrusion of stem and leaf tissue are mediated by specialized infection organs called haustoria that develop close to the apical stem tip. The initiation of haustorium differentiation is marked by site-specific cell elongation in areas where the parasite has contact with a host plant, and which is visible as a unilateral swelling of the parasite's stem (Fig. 1). Subsequently, adhesive substances are secreted by the epidermis around the protruding haustorium (Vaughn, 2002), anchoring the parasite to the host and allowing the infection organ to grow into the host tissue using a combination of mechanical pressure and enzymatic digestion (Nagar *et al.*, 1984; Johnsen *et al.*, 2015; Kaiser *et al.*, 2015) (Fig. 1). Upon reaching host xylem or phloem elements, searching hyphae emerge from the body of the haustorium and differentiate into these respective cell types, facilitating the transport of water and sugars from host to parasite

(Vaughn, 2006). The successful connection to the host's nutritional resources is visibly indicated by further swelling of the attached region, side shoot protrusion from the infection site, and restoration of apical tip growth, which typically ceases during the two previous stages (Fig. 1). Through the haustorium, a large variety of compounds are taken up by *Cuscuta* including small inorganic and organic molecules such as sugars, hormones, and amino acids, and macromolecules such as proteins and RNAs. These appear to serve both nutritional and regulatory purposes in this mutual interaction (Aly, 2013; Kim and Westwood, 2015). Having to share so many resources exposes the parasitized plants to a considerable amount of stress, and can result in reduced biomass or even host death in cases of severe attacks. In agricultural areas, the control of parasitic plants is difficult due to the physiological similarity and intimate connections of host and parasite. Thus, increased knowledge of the molecular mechanisms underlying haustorium development and host infection is required to develop effective strategies for combating the negative impacts of parasitic weeds (Aly, 2007; Alakonya *et al.*, 2012; Jiang *et al.*, 2013; Ichihashi *et al.*, 2015). This is even more adamant when considering that many species of *Cuscuta*, in contrast to most other parasitic lineages, are

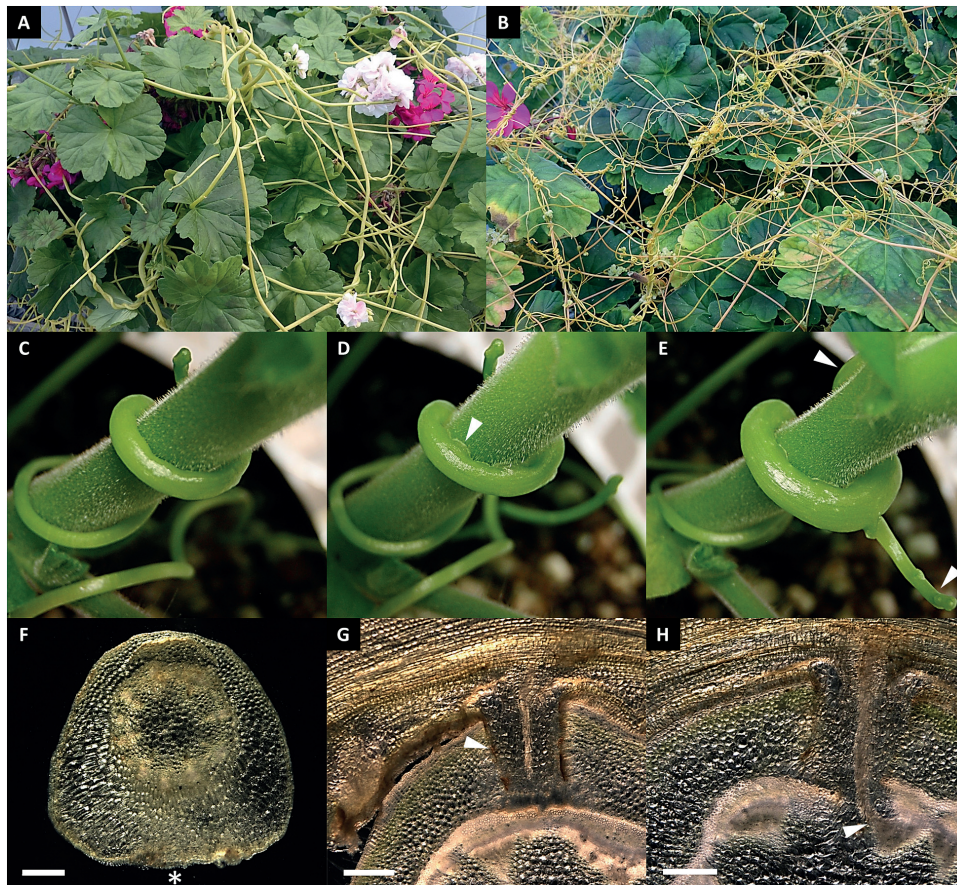

**Fig. 1.** *Cuscuta* infecting the compatible host plant *P. zonale*. (A) *C. reflexa* and (B) *C. gronovii* parasitizing *P. zonale*. The infection of *P. zonale* by *C. reflexa* can be divided into three stages. (C and F) In the first swelling stage the parasite stem grows in width at the side facing the host (asterisk). (D and G) After attachment to the host surface (arrowhead in D), the haustorium (arrowhead in G) invades the host tissue (penetrating stage). (E and H) The mature stage is defined by established connections between the vascular systems of the two plants (arrowhead in H) and is recognized by apical shoot growth and the formation of additional side shoots (arrowheads in E). Cross-sections were made with respect to orientation of the parasite shoot axis in (F), and with respect to the host shoot axis in (G) and (H). Scale bars are 500 μm.

generalists, being able to parasitize a large number of dicotyledonous plant species from different phylogenetic taxa. This variation in hosts can entail some molecular tuning of the infection process, for example by adapting the type of nutrient transfer cells in the mature haustoria to the type of host (Christensen *et al.*, 2003). The onset of haustorium differentiation, however, does not seem to be influenced by different hosts, but rather depends on the presence of general signals initiating the infection process. The fact that the formation of *Cuscuta* haustoria can be stimulated in the absence of a host plant by applying a combination of far-red (FR) light and tactile stimuli corroborates this hypothesis (Tada *et al.*, 1996). Haustoria induced in this way share morphological traits with haustoria developing in contact with a host plant, but have the advantage that the early stages of their development are more uniform and predictable than when induced by host attachment. In addition, in molecular studies, the consideration of RNA molecules transferred from the host can be neglected.

Cell wall polymer profiling in infecting and non-infecting tissues of *Cuscuta* recently revealed such substantial differences in cell wall composition (Johnsen *et al.*, 2015) that the initiation of changes to the cell wall must be assumed to occur early in haustoriogenesis. In the present study, gene expression in haustoria and stems of two *Cuscuta* species, *C. reflexa* and *C. gronovii*, was therefore analysed with the goal of identifying cell wall-related genes that mark the onset and progress of haustorium development. *Cuscuta reflexa*, a member of the subgenus *Monogynella*, possesses thick and yellow to green stems, while *C. gronovii* has thinner and more delicate stems of yellow to orange colour (Fig. 1A, B) and belongs to the subgenus *Grammica* (Costea *et al.*, 2015). The distinct expression of xyloglucan endotransglucosylases/hydrolases (XTHs) in young haustorial tissues of both *C. reflexa* and *C. gronovii* was further substantiated by protein immunolocalization and xyloglucan endotransglucosylation (XET) assays. The potential function of XTHs in *Cuscuta* haustorium development and host plant infection will be discussed.

## Materials and methods

### Plant material

*Cuscuta reflexa* and *C. gronovii* were propagated on the compatible host *Pelargonium zonale* (Fig. 1) in a greenhouse at the Phytotron of the University of Tromsø, Norway, in 24 h of light at 21 °C. For RNA sequencing and for the induction of haustorium development with the FR light system, filaments of *Cuscuta* that were distal to the host infection sites were used. For the analysis of host-induced haustorial stages, infection sites on *P. zonale* were visually inspected for the characteristics of the different stages: the swelling stage before penetration of the host that was defined as the starting point of haustoriogenesis (Fig. 1C, 1F); the penetrating stage after initial intrusion into the host tissue but before the parasite is able to feed (Fig. 1D, 1G); and the mature feeding stage that is recognized by further swelling of the attached region, protruding side shoots from the infection site, and restoration of apical tip growth (Fig. 1E, 1H). Other samples encompassed stems at least 5 cm distal to infection sites and to shoot tips, elongating stem regions (an area of 3–5 cm below the apical tip), and shoot tips (first apical centimetre of shoot).

### FR light induction of haustoriogenesis

Host-free induction of haustorium development was carried out as described by Tada *et al.* (1996) with minor modifications. To facilitate tactile stimuli, apical shoot tips of ~10 cm (harvested from the propagating culture) were placed between two plastic Petri dishes (Ø=13.5 cm) that were lightly pressed and held together using adhesive tape. The pressed shoot tips were then placed in an upright position and irradiated with FR light (740 nm) for 1 h. After light treatment, the shoots were kept in darkness before further analysis. Tissue for RNA isolation was harvested from stem segments with and without haustoria, 3 d or 6 d after FR light induction, as indicated.

### RNA isolation

All plant material used for RNA isolation was snap-frozen in liquid nitrogen and homogenized using a TissueLyser (Qiagen, Hilden, Germany). Total RNA was isolated using a combination of the hot borate method (Wan and Wilkins, 1994), and phenol–chloroform extraction in which pre-warmed (65 °C) borate buffer (200 mM Borax, 30 mM EDTA, 1% (w/v) SDS) and phenol were added to the frozen plant material to make up the first liquid–liquid extraction. Subsequently, one extraction with phenol:chloroform:isoamylalcohol (25:24:1) and two with chloroform:isoamylalcohol (24:1) were executed before total RNA was precipitated in 2 M LiCl at 4 °C overnight. In order to remove residual DNA, the RNA samples were treated with DNase using the DNA-free kit (Ambion Inc., Austin, TX, USA). Removal of DNA and integrity of RNA were checked by agarose gel electrophoresis.

### Construction of suppression subtractive hybridization (SSH) libraries and sequencing of subtracted cDNA clones

The two cDNA libraries used for generating differentially expressed SSH libraries were synthesized from 250 ng of DNase-treated total RNA isolated from FR light-induced haustoria or stems 3 d after light treatment (for each RNA isolation, material was pooled from six induced shoots) using the SMARTer Pico PCR cDNA Synthesis kit (Clontech, Mountain View, CA, USA). SSH was carried out with the PCR-Select cDNA Subtraction Kit (Clontech). The Advantage 2 PCR Kit (Clontech) was used for all PCR amplifications. After amplification, the differentially expressed cDNAs were cloned into the pGEM-T Easy vector system (Promega, Madison, WI, USA). One Shot TOP10 Chemically Competent *Escherichia coli* cells (Invitrogen, Carlsbad, CA, USA) were transformed with the SSH libraries and incubated on LB/Carbenicillin/X-Gal/IPTG plates at 37 °C for blue/white screening. All procedures were carried out according to the manufacturers' instructions. Plasmid DNA was isolated from white colonies by alkaline lysis (Birnboim and Doly, 1979) and sequenced with M13F primer (5' GTAAAACGACGGCCAGT 3') by Sanger sequencing (Macrogen Korea, Seoul, Korea).

### De novo transcriptome sequencing and assembly

Poly(A)<sup>+</sup> RNA purification, reverse transcription, size fractionation, titration, and sequencing were performed at the Norwegian High Throughput Sequencing Centre (NSC; Oslo, Norway) on a Roche GS FLX (454) sequencer. One-eighth of a run for both libraries was done as a test run, followed by re-titration and a full run with the same libraries. Together, both runs yielded 945 454 raw reads for *C. reflexa* and 914 135 raw reads for *C. gronovii*. Raw data were then processed using the ngs\_backbone v.1.1.0 pipeline (Blanca *et al.*, 2011). After trimming, filtering, and quality assessment, Mira (version 3.2.0) (Chevreux *et al.*, 1999) was used to assemble the reads into contigs. The applied job options were 'denovo, est'. The reliability of the assemblies was confirmed with an independent assembly strategy using the SeqClean Software for cleaning and the TGICL pipeline for the assembly (DFCI Gene Indices Software Tools,

ftp://occams.dfc.harvard.edu/pub/bio/tgi/software/) (data not shown). Sequences were filtered using the Rfam (Griffiths-Jones *et al.*, 2005) and the SILVA (Quast *et al.*, 2013) databases. This Transcriptome Shotgun Assembly project has been deposited at DDBJ/EMBL/GenBank under the accession numbers GDKE000000000 (*C. gronovii*) and GDKD000000000 (*C. reflexa*). The versions described herein are the first versions, GDKE010000000 (*C. gronovii*) and GDKD010000000 (*C. reflexa*).

#### Analysis of *de novo* transcriptomes and SSH clones

For functional annotation, the transcriptome contigs were analysed by sequence-based and domain-based alignments. Sequence-based alignments were performed with BLAST (blastx) (Altschul *et al.*, 1990) against the non-redundant (nr) protein database at NCBI (<http://www.ncbi.nlm.nih.gov/protein>) and the UniProt protein databases Swiss-Prot and UniRef90 (<http://www.uniprot.org/>). The E-value thresholds were set to  $1e^{-15}$ . Conserved protein domains were searched by using HMMER tools (HMMER 3.1, <http://hmm.janelia.org/>) with the PFAM database (PFAM 27.0; Finn *et al.*, 2014). The online tool Mercator (Lohse *et al.*, 2014) was used to map all contigs to functional modules defined by the plant-specific ontology and pathway tool MapMan (Usadel *et al.*, 2005).

Sequences of the SSH clones were trimmed by deleting vector backbone sequences (pGEM-T Easy) and poly(A) tails before comparison with the *C. reflexa* transcriptome using BLAST (blastn; E-value:  $1e^{-99}$ ). The sequences which did not give a match with any of the contigs in the *C. reflexa* reference collection were aligned in Geneious Pro 5.6.6 (Biomatters Ltd, Auckland, New Zealand) with ClustalW (Li, 2003). Functional annotation was again conducted with Mercator. The minimum BLAST bit score was set to 50.

#### Phylogenetic analysis of XTHs

A rooted Neighbor-Joining tree was generated with PhyML on a ClustalW protein alignment of all *Arabidopsis thaliana* XTHs identified in the UniProt database (UniProt-Consortium, 2015), the two *C. reflexa* XTHs (Cr-XTH-1 and Cr-XTH-2) and a previously identified XTH, LeXTH1 (alias XTH1\_Sly) from tomato, *Solanum lycopersicum* (Albert *et al.*, 2004). *Solanum lycopersicum* Expansin A23 served as the root. The Jones-Taylor-Thornton (JTT) model was used for amino acid substitutions, and the phylogram was optimized for substitution rates. One thousand bootstrap replications were conducted. All calculations were performed with Geneious Pro 5.6.6 (Biomatters Ltd).

#### Reverse transcription quantitative real-time PCR (RT-qPCR)

SuperScript II Reverse Transcriptase (Invitrogen) and anchored oligo(dT)<sub>18</sub> primers were used to synthesize cDNA from 1  $\mu$ g of DNase-treated total RNA. Controls without reverse transcriptase were carried out for each target gene in order to verify the complete absence of contaminating DNA. Quantitative real-time PCR was performed in technical duplicates using the SsoFast EvaGreen Supermix (Bio-Rad, Oslo, Norway) according to the manufacturer's specifications. Thermal cycling and fluorescence detection was carried out using a CFX96 Real-Time PCR Detection System (Bio-Rad) with the following cycling conditions: 95 °C for 30 s followed by 40 cycles of 95 °C for 5 s and 61 °C for 5 s. After 40 cycles, melt curves were recorded by stepwise heating from 65 °C to 95 °C. The amplification efficiencies were taken into account when calculating the relative abundances of each target gene (Pfaffl, 2001). Relative abundances of *C. reflexa* (Cr)-ACTIN and Cr-SF2 were used to normalize the expression levels between *C. reflexa* samples. *Cuscuta gronovii* (Cg)-ACTIN and Cg-SF2 were used as reference genes for *C. gronovii*. In samples where a target transcript could not be detected in any of the technical duplicates [i.e. no C<sub>q</sub> (quantification cycle) value], a C<sub>q</sub> value was assigned by adding one cycle to the highest C<sub>q</sub> in that run. Data were analysed with the CFX

Manager Software 2.0 (Bio-Rad). Gene-specific primer sequences with their respective amplicon sizes and PCR efficiencies are listed in Supplementary Table S1 available at *JXB* online. Amplicon melt curve analyses and size separation on agarose gels are presented in Supplementary Figs S1 and S2, respectively.

#### Immunolocalization of XTHs

Cross-sections (70  $\mu$ m) of haustoria 3 d after FR light induction were prepared using a Leica VT1000E vibratome (Leica Biosystems, Nussloch GmbH, Nussloch, Germany). Free binding sites were blocked for 30 min with 5% (w/v) non-fat milk powder in standard phosphate-buffered saline buffer (1 $\times$  PBS) (blocking buffer). After washing with PBS, 1:20 dilutions of polyclonal anti-XTH rabbit IgGs or IgGs from the pre-immune serum (both provided by Dr E. Labrador and her group at the University of Salamanca, Spain) in blocking buffer were applied to the sections for 2 h followed by three 5 min washes with PBS. The sections were then incubated for 1 h in the dark with Alexa Fluor 555 Goat Anti-Rabbit IgG (Life Technologies, Carlsbad, CA, USA) (1:200 in blocking buffer) and subsequently washed with PBS. Labelled sections were stained with toluidine blue O in order to quench autofluorescence. Micrographs were taken with a SteREO Lumar V12 equipped with an AxioCam MRc5 camera and the Lumar 43 filter set (all from Carl Zeiss, Jena, Germany).

#### XET action assays

XET test papers were prepared as described by Fry (1997). A piece of Whatman No. 1 filter paper was passed over the surface of 1% (w/v) Tamarind xyloglucan (Megazyme, Ireland) dissolved in 0.5% (w/v) chlorobutanol and left to dry. The dry xyloglucan-coated paper was dipped in 5  $\mu$ M sulphorhodamine-labelled xyloglucan oligosaccharides (XyGO-SR) dissolved in 75% (v/v) acetone and dried before use. XyGO-SR were prepared by conjugation of xyloglucan oligosaccharides with sulphorhodamine carried out as described by Kosik and Farkas (2008). Xyloglucan-coated papers without XyGO-SR were used as control papers. Tissue prints were made by placing hand-cut 0.5–1.0 mm thick pieces of *Cuscuta* cross-sections on XET test papers or control papers soaked in 50 mM Na-acetate, 300 mM NaCl (pH 5.5) followed by incubation between two sheets of acetate for 1 h. The background on printed papers was removed by washing in water:ethanol:formic acid (1:1:1) for 2 h with gentle agitation followed by rinsing in distilled water. Fluorescence micrographs were taken of dried de-stained papers using a SteREO Lumar V12 equipped as described above.

## Results

### Identification of haustorium-specific gene transcripts

Tada *et al.* (1996) reported that the formation of haustoria in *C. japonica* can be induced through the synergistic effect of FR light and tactile stimuli without the presence of a host plant. In the present study, the same signals were applied to activate haustorium differentiation in *C. reflexa* and *C. gronovii*. While host plant infection by *Cuscuta* progressed with varying speed, the development of FR light-induced haustoria proceeded in a very predictable manner: 3 d after treatment with FR light the parasite stem was noticeably swollen at one side, and after 6 d the haustorial body could be discerned (shown for *C. reflexa* in Fig. 2). Cross-sections of these young haustorial stages (Fig. 2C, D) resembled those during early host infection (Fig. 1F). The predictability of haustorial onset is, of course, a distinctive advantage when searching for

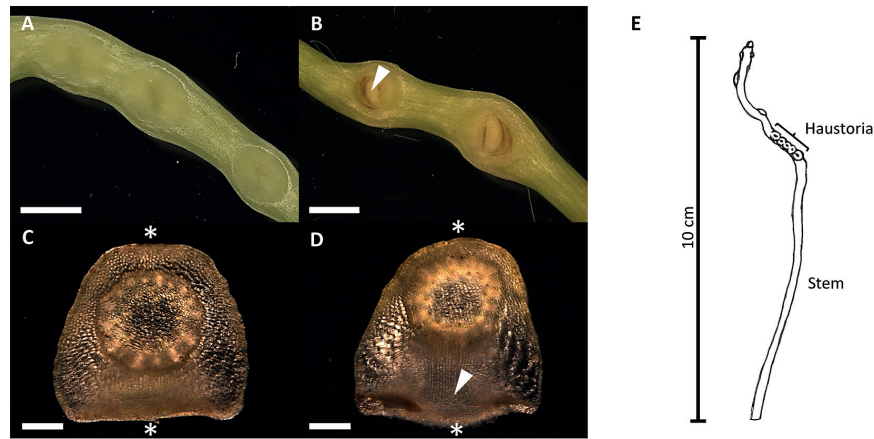

**Fig. 2.** Haustorium development of FR light-induced *C. reflexa* shoots. (A and C) Initial stages of haustoriogenesis were visible 3 d after treatment with FR light. (B and D) After 6 d, the haustorial body (arrowheads in B and D) could be discerned. Asterisks indicate sites of contact with the plastic surface of the Petri dish. (E) Schematic overview of FR light-induced *C. reflexa* shoots indicating the young haustoria and stem areas used for SSH. Cross-sections were made with respect to the orientation of the parasite shoot axis. Scale bars are 2000  $\mu\text{m}$  (A and B) and 500  $\mu\text{m}$  (C and D).

developmentally regulated genes in the *Cuscuta* haustorium. Moreover, the intimate connection between parasite and infected host, and the translocation of transcripts from host to parasite through the haustorium (Leblanc *et al.*, 2012; Kim *et al.*, 2014), makes it difficult to avoid contamination of the RNA from haustorial infection sites with host-encoded transcripts. The concentration of host mRNA in *Cuscuta* is generally increased towards the host–parasite interface (Leblanc *et al.*, 2013), which would lead to an enrichment of host transcripts during the SSH procedure and consequently mask the differences in parasitic gene expression (Diatchenko *et al.*, 1996). Therefore, haustoria and stem tissue from FR light-induced shoot tips of *C. reflexa* were used for the generation of differentially expressed SSH libraries (Fig. 2E).

The SSH procedure is directional, only enriching transcripts that are present in higher abundance in one sample (tester) compared with another (driver). In this study, the SSH was carried out in both directions, leading to the construction of two libraries: the haustorium library enriched for sequences that are more abundant in young (3-day-old) haustoria than in the stem; and the reciprocal stem library enriched for sequences with higher expression in the stem tissue. Clones from both libraries were randomly picked and sequenced, yielding 182 and 179 readable sequences from the stem- and haustorium-specific libraries, respectively, which were subjected to an analysis by the functional annotation tool Mercator (Lohse *et al.*, 2014). Mercator combines sequence similarity searches to a variety of plant genomes as well as information derived from InterProScan, KOG, and cdd searches, and assigns them to so-called bins representing different functional categories. Seventy-nine stem-specific sequences and 89 haustorium-specific sequences could be confidently assigned to a MapMan category. The quantitative distribution of assigned functions showed that particularly transcripts associated with the bins ‘cell wall’, ‘DNA’, ‘development’, and ‘misc’ were frequent in the haustorium-specific library but not in the stem-specific library (Fig. 3). The stem library, on the other hand, contained more transcripts for genes associated with the bins ‘protein’, ‘RNA’, and ‘redox’.

*De novo* sequencing of transcriptomes of two *Cuscuta* species

To create a ‘baseline’ for the relative sizes of MapMan categories in *Cuscuta*, the representation of MapMan bins in entire transcriptomes was investigated. For that purpose, 454-based *de novo* sequencing of the mRNAs from pooled vegetative tissue of *C. reflexa* and a second species, *C. gronovii*, was performed. These reference transcriptomes were also expected to improve the sequence information for the transcripts of interest obtained by the SSH screen. One and one-eighth 454 runs (see the Materials and methods) yielded just under  $1 \times 10^6$  raw reads per species, which resulted in a total of 42 103 and 31 685 contigs for *C. reflexa* and *C. gronovii*, respectively (Table 1). Both the average and largest contig sizes were only marginally larger in *C. reflexa* than in *C. gronovii*. To predict the function of the *Cuscuta* contigs, their sequences were compared with different databases. The NCBI nr database, the UniProt Swiss-Prot and the UniRef90 databases individually yielded hits with up to 96% of the sequences for both species (Table 2). All approaches combined (i.e. nr, Swiss-Prot, and PFAM) allowed the annotation of 98% of the contigs of *C. reflexa* and of *C. gronovii* (Table 2).

Using Mercator (Lohse *et al.*, 2014), 52% of the *C. reflexa* contigs and 55% of the *C. gronovii* contigs could be assigned to bins. The distribution chart in Fig. 4 shows that most cellular functions are covered by the contig collections of both *Cuscuta* species and that the relative distribution of contigs to most of the bins is overall similar. Cell wall-related transcripts were not over-represented in the total transcriptomes (Fig. 4), substantiating the suspicion that their abundance in the haustorium-specific SSH cDNA library (Fig. 3) reflects elevated cell wall remodelling activities in this tissue.

A direct sequence homology comparison between the two *Cuscuta* species showed that 73% (23 196) of the *C. gronovii* contigs had homologues in the *C. reflexa* transcriptome, while 64% (26 894) of the *C. reflexa* transcripts were also retrieved in *C. gronovii* (Fig. 5A). The difference in the percentages is at least in part due to the lower number of contigs assembled for

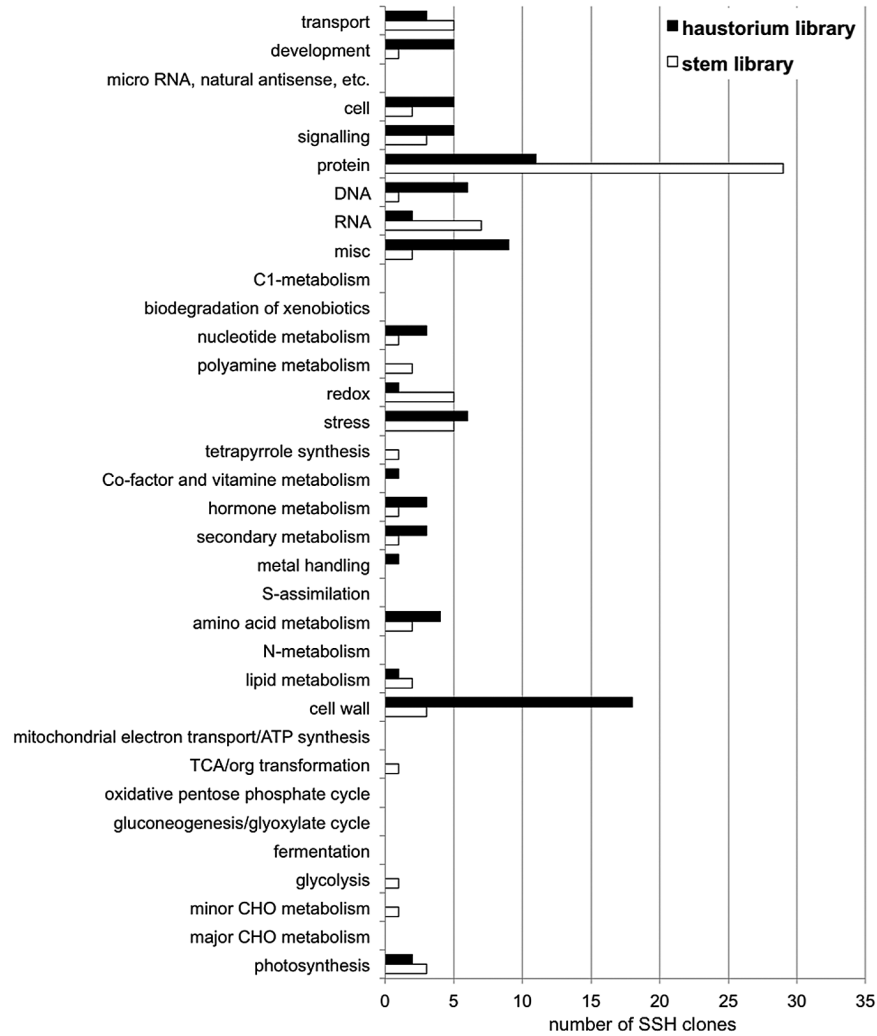

**Fig. 3.** MapMan binning of *C. reflexa* SSH clones. The clones were mapped and functionally classified using the online tool Mercator. The minimum BLAST bit score was set to 50.

**Table 1.** Summary of 454 sequencing data and contig assembly

|                                | <i>C. gronovii</i> | <i>C. reflexa</i> |
|--------------------------------|--------------------|-------------------|
| <b>Number of raw sequences</b> | 914 135            | 945 254           |
| <b>Number of contigs</b>       | 31 685             | 42 103            |
| <b>Mean contig size</b>        | 800.4 bp           | 843.9 bp          |
| <b>Largest contig</b>          | 5 965 bp           | 6 735 bp          |
| <b>N25</b>                     | 1 318 bp           | 1 391 bp          |
| <b>N50</b>                     | 867 bp             | 906 bp            |
| <b>N75</b>                     | 617 bp             | 642 bp            |

*C. gronovii*. For contigs belonging to the cell wall-related bin, congruencies were even a bit higher. Of the 452 (*C. gronovii*) and 614 (*C. reflexa*) contigs that were sorted to this bin, 379 (84%) and 483 (79%), respectively, were also found in the other *Cuscuta* species (Fig. 5B).

#### Validation of differential expression by RT-qPCR

The reference transcriptomes described above provided information on complete or almost complete cDNA sequences for

most of the partial cDNA clones that were recovered from the SSH libraries. With this additional sequence information, RT-qPCR primers for validation of the differential transcript accumulation indicated by the SSH were generated. To this end, the relative expression levels of 10 genes from the haustorium library and two genes from the stem library putatively related to cell wall functions were quantified in the RNA samples used for the SSH by RT-qPCR. All genes displayed fold changes that reflected the differential expression suggested by the SSH; the two stem-specific genes (*Cr-GH5* and *Cr-GT20*) were less expressed in young haustoria compared with the stem, whereas the transcript abundances of the 10 haustorium-specific genes (*Cr-GH1*, *Cr-GH17*, *Cr-GH31*, *Cr-PAE*, *Cr-PX-1*, *Cr-PX-2*, *Cr-PX-3*, *Cr-RGP*, *Cr-XTH-1*, and *Cr-XTH-2*) were higher in the haustorial tissue (Table 3).

#### Expression mapping of differentially expressed genes

In order to investigate if these tentative haustorium-associated genes were also expressed during host-induced haustoriogenesis and if their expression is maintained during later stages of haustorium development or not, the gene-specific

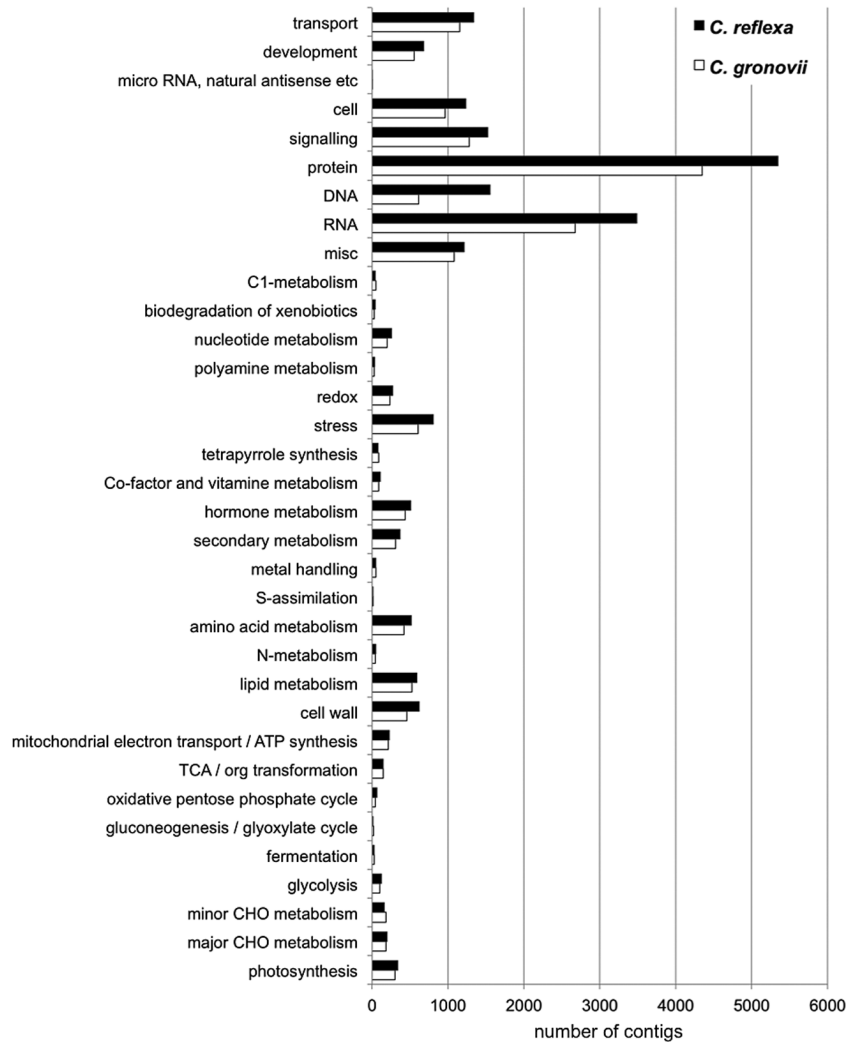

**Fig. 4.** MapMan binning of *Cuscuta* transcriptome contigs. The contigs were mapped and functionally classified using the online tool Mercator. The minimum BLAST bit score was set to 50.

**Table 2.** Annotation of *Cuscuta* contigs

The number of contigs with hits to annotated sequences in public databases (blastx thresholds E-value:  $1e-15$ ) and with no annotation are shown (percentages in parentheses).

|                    | nr (NCBI)    | SwissProt (UniProt) | UniRef90 (UniProt) | PFAM 27.0 (EMBL-EBI) | No annotation |
|--------------------|--------------|---------------------|--------------------|----------------------|---------------|
| <i>C. gronovii</i> | 29 052 (92%) | 30 105 (95%)        | 30 347 (96%)       | 13 780 (43%)         | 555 (2%)      |
| <i>C. reflexa</i>  | 38 944 (92%) | 39 465 (94%)        | 39 927 (95%)       | 18 648 (44%)         | 984 (2%)      |

transcript abundances were quantified in swelling, penetrating, and mature stages of *C. reflexa* infecting *P. zonale*. All genes displayed similar expression levels in the early swelling stage of the host infection to those in the FR light-induced haustoria (Fig. 6). The expression in the stems was also similar, indicating that FR light irradiation in itself had no severe effect on the expression of these genes. Interestingly, *Cr-RGP*, *Cr-PAE*, two glycoside hydrolase members (*Cr-GH31* and *Cr-GH1*), the two XTH genes (*Cr-XTH-1* and *Cr-XTH-2*), and the peroxidase genes *Cr-PX-2* and *Cr-PX-3* showed a considerable decrease in expression levels in the more advanced stages of haustorium development (Fig. 6).

To examine further if these genes were expressed in young haustoria only as a result of the high rates of cell division and cell elongation in these organs, the expression levels were also quantified in growing shoot tips, where the apical meristem is located, and in the stem region just below the tip that displays high rates of elongation (see Supplementary Fig. S3 at JXB online). While some genes indeed displayed an expression behaviour that suggests a general association with either cell division, cell elongation, or both (e.g. *Cr-GH17*, *Cr-RGP*, and *Cr-GH31*), the two *Cr-XTH* genes and *Cr-PX-2* showed a more differentiated expression pattern with a clear increase in young haustoria (Fig. 6). These three genes displayed the

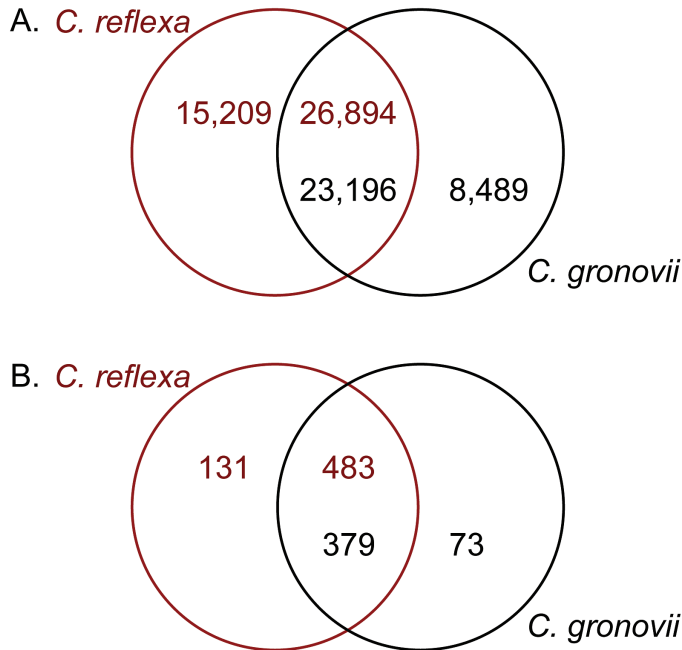

**Fig. 5.** Contig overlap between the two *Cuscuta* species (A) for all contigs and (B) for contigs related to cell wall functions. The Venn diagrams show how many contigs in the *C. reflexa* (top row) and *C. gronovii* (bottom row) transcriptomes have homologues in the other species (blastn threshold E-value: 1e-10). (This figure is available in colour at JXB online.)

**Table 3.** Validation of SSH-identified differentially expressed cell wall-related genes by RT-qPCR

Gene designations, the corresponding SSH library, and fold changes  $\pm$ SD of technical duplicates are shown.

| SSH library    | Gene            | Fold change (H:S) <sup>a</sup> |
|----------------|-----------------|--------------------------------|
| Haustorium     | <i>Cr-GH1</i>   | 15 $\pm$ 2.3                   |
|                | <i>Cr-GH17</i>  | 2.2 $\pm$ 0.54                 |
|                | <i>Cr-GH31</i>  | 25 $\pm$ 3.6                   |
|                | <i>Cr-PAE</i>   | 11 $\pm$ 2.8                   |
|                | <i>Cr-PX-1</i>  | 1.9 $\pm$ 0.33                 |
|                | <i>Cr-PX-2</i>  | 781 <sup>b</sup>               |
|                | <i>Cr-PX-3</i>  | 8.2 $\pm$ 1.2                  |
|                | <i>Cr-RGP</i>   | 13 $\pm$ 1.9                   |
|                | <i>Cr-XTH-1</i> | 129 $\pm$ 21                   |
|                | <i>Cr-XTH-2</i> | 195 $\pm$ 29                   |
|                | Stem            | <i>Cr-GH5</i>                  |
| <i>Cr-GT20</i> |                 | -16 $\pm$ 4.8                  |

<sup>a</sup> Values are means of technical duplicates in the normalized transcript abundances of the RNA sample used to generate the tester cDNA for the haustorium library (H) compared with the RNA sample used to generate the tester cDNA for the stem library (S). Reference genes: *Cr-ACTIN* and *Cr-SF2*.

<sup>b</sup> No SD because target transcript could not be detected in the stem RNA sample.

highest differential expression levels, with changes of  $\geq 80$ -fold in both our experiments (Table 3; Fig. 6). Moreover, the closest homologues to *Cr-XTH-1* and *Cr-XTH-2* in *C. gronovii*, *Cg-XTH-1* and *Cg-XTH-2*, were both more highly expressed in young FR light-induced haustoria than in stems of this species (Fig. 6). The numerical values of all gene expression levels are presented in Supplementary Tables S2 and S3.

Interestingly, the increased expression of a tomato gene encoding an XTH, *Lycopersicon esculentum LeXTH1* (here referred to as *S. lycopersicum XTH1\_SLY*), has been described as a possible defence reaction of an incompatible tomato plant being attacked by *C. reflexa* potentially by tightening the cell walls (Albert et al., 2004). A comparison of the XTH1\_SLY protein sequence and the *Cuscuta* XTHs showed that the tomato protein is very similar to Cr-XTH-2 and that both cluster with the *A. thaliana* XTH4 and XTH5 proteins in group 1 (Rose et al., 2002) (Fig. 7). In contrast, Cr-XTH-1 clusters with *A. thaliana* XTH15 and XTH16 within group 2 of this protein family.

#### Presence and distribution of XTH proteins and of XET action

To approach the putative functionality of XTHs in *Cuscuta* haustorium development, an XTH-specific antibody (Jimenez et al., 2006) was used to label the proteins in cross-sections of FR light-induced haustoria. Fluorescence micrographs indicated that these xyloglucan-modifying enzymes are located in the cell walls of elongating cells in the areas flanking the haustorial initiation centre (Fig. 8); that is, in the part that is responsible for the swelling of the stem during attachment to a host plant. Furthermore, the xyloglucan endotransglucosylation action of XTHs was analysed in cross-sections of young FR light-induced haustoria as well as swelling, penetrating, and mature infection sites of *C. reflexa* infecting *P. zonale* by *in situ* XET action assays. Xyloglucan endotransglucosylation was detected in the parasite throughout haustorium development, with a clear bias towards the side facing the host plant (Fig. 9). Weaker XET action was also detected in the endophytic part of the haustorium. In contrast, the host plant did not display XTH-specific action. Tissue printing on control papers did not produce any fluorescent signal (data not shown). The detected XET action in the swelling areas of FR light-induced haustoria correlated with the immunolocalization patterns observed for these proteins (Supplementary Fig. S4 at JXB online). In contrast, enzyme extracts from *Cuscuta* haustoria had no detectable hydrolytic activity towards Tamarind xyloglucan (Supplementary Fig. S5).

## Discussion

Most existing studies on the specific gene expression changes unfolding during the interaction between species of *Cuscuta* and their hosts have focused on genes expressed by the host upon parasitization. Differentially expressed host genes representing various functions, including general plant pathogen defence responses and cell wall metabolism, were identified by differential display or SSH techniques (Borsics and Lados, 2002; Albert et al., 2004; Li et al., 2009). A study on differential gene expression in *Cuscuta* has identified a cysteine protease, Cuscutain (Bleischwitz et al., 2010), but with the exception of this, corresponding studies are very scarce. Two aspects potentially aggravate the identification of *bona fide* differentially expressed genes during *Cuscuta* haustorium



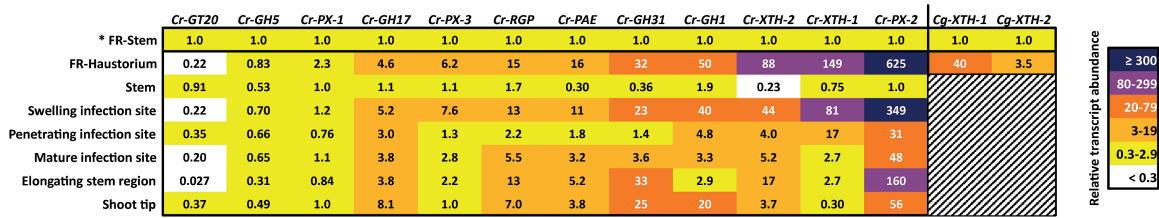

**Fig. 6.** Expression of cell wall-related genes in tissues of *Cuscuta*. Transcript abundances in relation to the transcript abundances in 'FR-Stem' (\* set to 1) are presented in a heat map with colours ranging from light (<0.3) to dark ( $\geq 300$ ). All transcript abundances in *C. reflexa* and *C. gronovii* are normalized to the abundances of *Cr-ACTIN* and *Cr-SF2* transcripts, and the abundances of *Cg-ACTIN* and *Cg-SF2* transcripts, respectively. Values are the mean of three biological replicates. (This figure is available in colour at JXB online.)

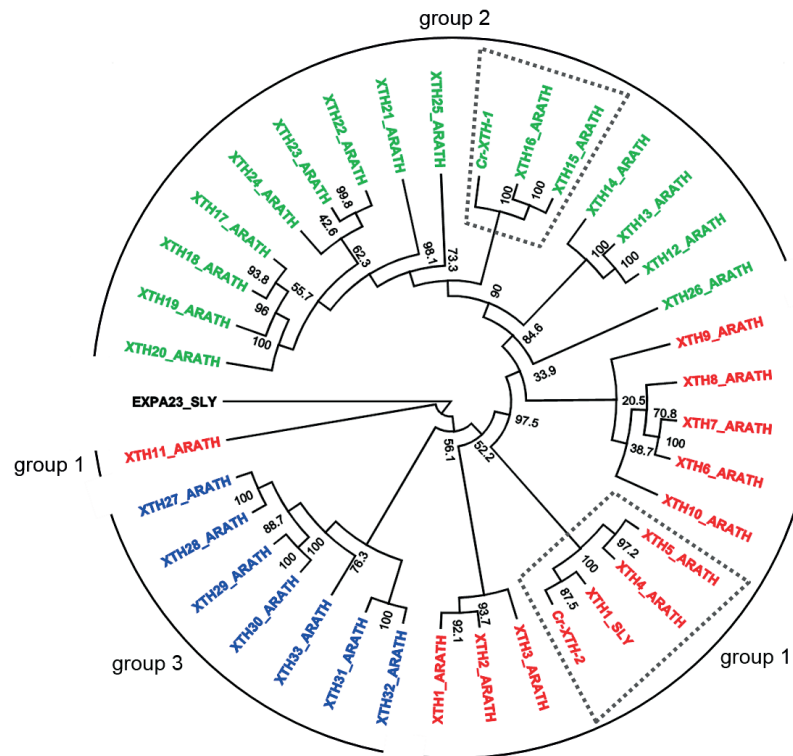

**Fig. 7.** Neighbor-Joining tree showing the relationship between *C. reflexa* XTH-1 and XTH-2 and *Solanum lycopersicum* XTH1 (XTH1\_SLY, formerly LeXTH1) based on their phylogenetic placement within the *Arabidopsis thaliana* XTH gene family tree. The tree was rooted with *S. lycopersicum* Expansin A23 (EXPA23\_SLY). The phylogram was optimized for substitution rates. Numbers next to the nodes represent bootstrap proportion values from 1000 replications. Designation of the subgroups 1–3 of the XTH protein family of *A. thaliana* are adopted from Rose *et al.* (2002). Clusters that include *Cr-XTH-1*, *Cr-XTH-2*, and XTH1\_SLY are accentuated by a surrounding broken line. (This figure is available in colour at JXB online.)

development: the uptake of host RNAs (Kim and Westwood, 2015) and the lack of a genome sequence from any *Cuscuta* species. In this study, these risks were mitigated by inducing haustoriogenesis in the absence of a host plant and by generating reference transcriptomes from two *Cuscuta* species using tissue that was not in contact with the host.

FR light in the range of 740 nm together with physical contact between the parasite and a surface (normally the host) were described to be effective inducers of haustorium development in the absence of a host plant (Tada *et al.*, 1996). The reversal of the inductive effect by red light (660 nm) further suggested the involvement of phytochrome in haustorium differentiation (Furuhashi *et al.*, 1997). FR light also triggers positive phototropism in seedlings of *Cuscuta*, prompting speculations that this fraction of the visible light that passes the green foliage provides an indication to the parasite that

hosts are present (Orr *et al.*, 1996). Morphologically, the early stages of haustorium development on a host plant and after FR light induction are similar (Figs 1, 2). Moreover, the present study demonstrated that all differentially expressed candidate genes, whose expression levels were quantified by RT-qPCR, displayed the same tendencies in the first stage of FR light- and host-induced haustoriogenesis (Fig. 6). This suggests that the physical stimuli sufficed to induce the transcriptional reprogramming and the ensuing tissue differentiation. The initial swelling stage during which the parasite attaches itself to the surface is followed by the protrusion of the discernible haustorium at ~6 d after FR light treatment (Fig. 2). Also at this advanced stage, gene-specific transcript abundances were comparable with those in penetrating stages of host plant infection (Supplementary Table S3 at JXB online), substantiating the conclusion that in these stages of

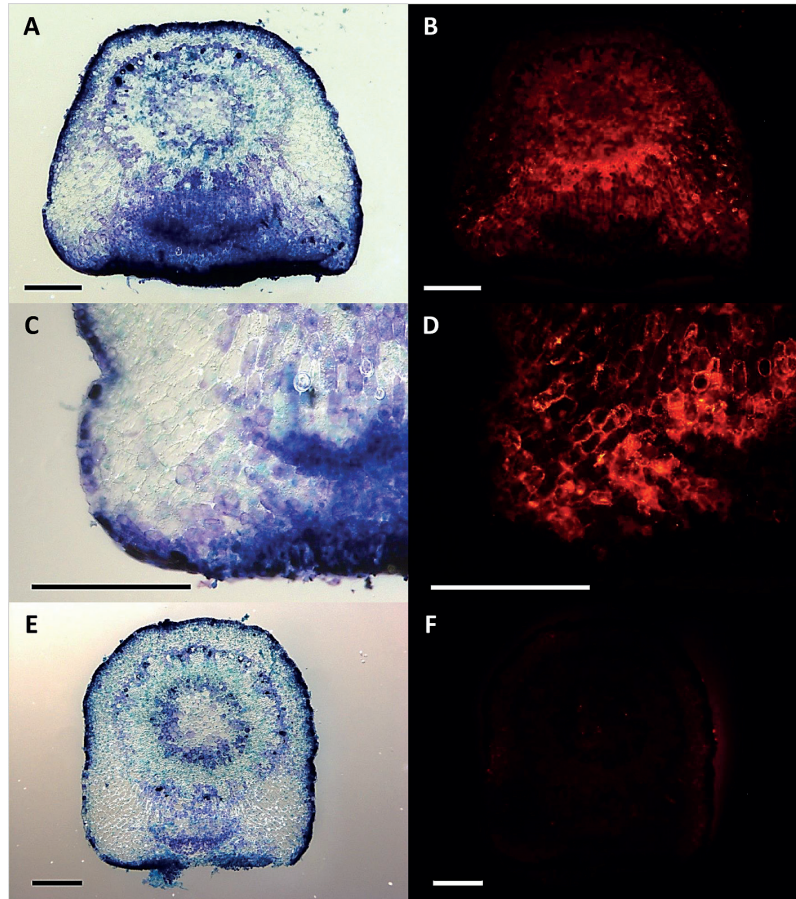

**Fig. 8.** Localization of XTHs in young FR light-induced haustoria. (A and C) Bright field and (B and D) fluorescence micrographs of toluidine blue O-stained and XTH-labelled cross-sections of haustoria 3 d after treatment with FR light. (E) Bright field and (F) fluorescence micrographs of control with pre-immune IgGs. Scale bars are 500  $\mu\text{m}$ .

haustorium development, changes in the transcriptional pattern do not depend on any host-derived signals. Ultimately, however, the plastic Petri dish hinders further growth of the haustorium, while in a host the differentiation of feeding hyphae commences. This last step that leads to an establishment of a physiological connection appears to be dependent on specific signals from the tissue that is invaded (Christensen *et al.*, 2003; Vaughn, 2006) and can therefore not be easily mimicked in a host-free system.

An analysis of the 394 SSH clones whose inserts were sequenced (198 and 196, respectively, for each library), already showed a clear bias towards different functional categories represented by the transcripts in each of the two SSH libraries. The most conspicuous bias was that towards cell wall-related functions in the haustorium-specific library (Figs 3, 4). This finding conforms well with recent reports of changes to the cell wall composition during host-invasive growth of *Cuscuta* (Johnsen *et al.*, 2015; Striberny and Krause, 2015). We therefore did not conduct more in-depth sequencing of the differentially expressed cDNA libraries and instead proceeded to profile the expression of cell wall-related genes during haustorium development and in comparison with other *Cuscuta* tissues exhibiting rapid growth. In haustoria, cell division and cell elongation are most pronounced in the shoot tips and a few centimetres below the tips, respectively (Supplementary

Figure S3 at *JXB* online). Quantitative expression analysis in these parts of the parasite can thus reveal whether the identified genes are associated with growth in general or whether they are specific to haustoriogenesis.

*Cr-GH17* and *Cr-GH31* are glycoside hydrolases that displayed expression levels in elongating stem regions and/or shoot tips of *C. reflexa* that were comparable with the expression levels in the young haustorial tissues (Fig. 6). The products of these genes are therefore not unique to the haustorium, but rather are characteristic for growing tissues of the parasite. The GHs are a large and widespread group of enzymes characterized by their ability to hydrolyse glycosidic bonds, thus facilitating breakdown of carbohydrates. The majority of GHs in plants are involved in cell wall metabolism (Frankova and Fry, 2013).

A third gene, *Cr-RGP*, which encodes a reversibly glycosylated polypeptide, also showed elevated expression levels in non-haustorial growing tissues of the parasite. RGPs are a family of proteins suggested to be involved in the synthesis of plant cell wall polysaccharides (Dhugga *et al.*, 1997), but whose exact function remains elusive. Based on sequence similarity, *Cr-RGP* belongs to class 1 RGPs (Langeveld *et al.*, 2002), which are tentatively associated with plasmodesmata (Sagi *et al.*, 2005).

Several studies connect pectins and its modifiers to host plant infection by *Cuscuta* (Nagar *et al.*, 1984; Srivastava *et al.*, 1994; Bar Nun and Mayer, 1999; Vaughn, 2002, 2003,

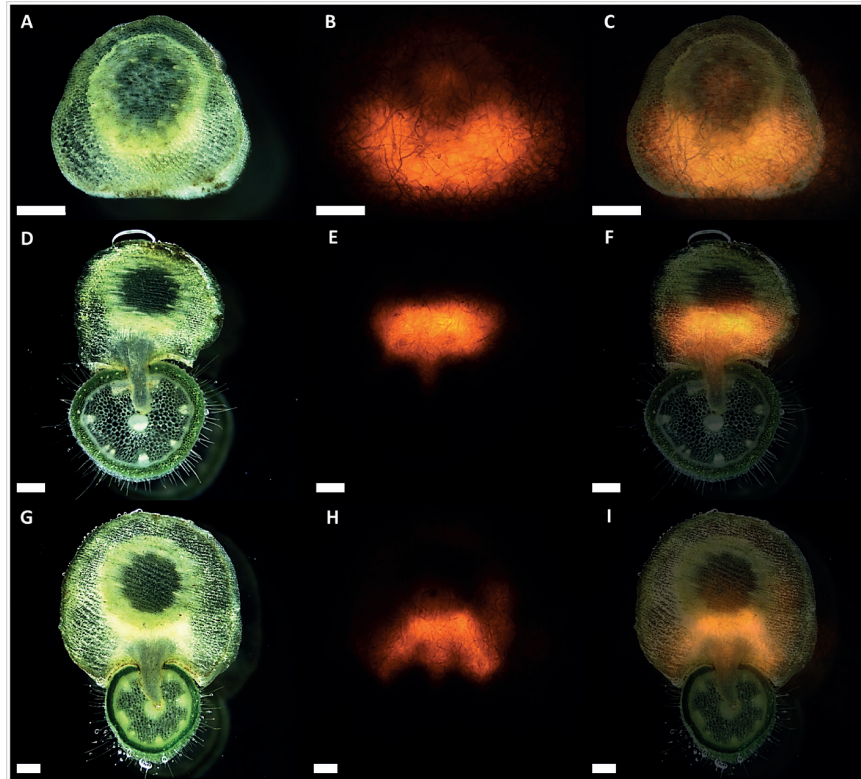

**Fig. 9.** XET action during infection of *P. zonale* by *C. reflexa*. Cross-sections of (A) swelling, (D) penetrating, and (G) mature infection stages tissue printed on XET test paper. (B, E, and H) Fluorescence micrographs showing XET action in the printed tissues in (A), (D), and (G), respectively. Merged pictures of (A–B), (D–E), and (G–H) are presented in (C), (F), and (I), respectively. Scale bars are 500  $\mu\text{m}$ . Visible fibres are integral to test papers.

2006; Johnsen *et al.*, 2015). In the present study, the transcript abundance of a pectin acetyltransferase, *Cr-PAE*, was found to be higher in young haustoria than in all other tested tissues of *Cuscuta* (Fig. 6), making it a potential marker gene for haustorium initiation and corroborating the role of pectin modification during the infection process.

*Cr-PX-2* and *Cr-PX-3* transcripts were also more abundant in young haustoria than in any of the other tissues (Fig. 6). Peroxidases are a large group of enzymes that catalyse the oxidation of a number of substrates (Battistuzzi *et al.*, 2010). In plants, PXs are associated with cell wall metabolism (Duroux and Welinder, 2003; Veitch, 2004) and with the defence against plant pathogens (Lamb and Dixon, 1997; Lopez-Curto *et al.*, 2006) so their relative abundance may indicate a ‘state of alert’ in the haustorial cells of *Cuscuta*.

Expression differences that were similarly large or even larger than those of the peroxidase genes and likewise specific to the young haustoria of *C. reflexa* were observed for *Cr-XTH-1* and *Cr-XTH-2*. XTHs are assigned roles in loosening of the plant cell wall by restructuring xyloglucans, allowing turgor-driven expansive cell growth (Rose *et al.*, 2002; Van Sandt *et al.*, 2007). Xyloglucans are the most abundant hemicelluloses in primary cell walls of dicotyledonous plants (Scheller and Ulvskov, 2010) so that all parasitic plants can be expected to display xyloglucan-modifying activities. The differential expression of closely related XTH genes in FR light-induced haustoria of *C. gronovii*, which belongs to a subgenus of *Cuscuta* different than *C. reflexa*, substantiates the assumption (Fig. 6). Also, Ranjan *et al.* (2014) found

seven *XTH* genes in *C. pentagona* that were more highly expressed at the pre-haustorial stage compared with seedlings and stems, suggesting that the early expression of these genes is in fact part of a common developmental pattern in most, if not all, *Cuscuta* species.

Recent epitope deletion assays (Vidal-Melgosa *et al.*, 2015) showed that specifically the group of xyloglucans containing the XXXG-motif is a target of enzymatic activity in haustoria and in the infected host (Johnsen *et al.*, 2015). In the present study, these previous investigations on xyloglucan-modifying enzymes were extended by immunolocalization studies and XET action assays using tissue prints on XET test papers. Anti-XTH labelling of 3-day-old FR light-induced haustoria confined the xyloglucan-modifying enzymes to the cell walls of elongating cells in the swelling areas of young haustoria (Fig. 8), indicating that restructuring of this hemicellulose is taking place during the initial stage of haustoriogenesis. *In vitro* activity assays using crude extracts suggested that the xyloglucan restructuring activity was not predominantly hydrolytic (see Supplementary Fig. S5 at JXB online). Correspondingly, *in situ* XET action assays clearly revealed xyloglucan endotransglucosylation in the swelling area of FR light-induced haustoria (Supplementary Fig. S4) and in the comparable area of haustoria that faces the host plant during infection (Fig. 9). Vaughn (2006) reported reduced cellulose and xyloglucan levels in the cell walls of phloic hyphae during the parasitization of *Impatiens* by *C. pentagona* and proposed that this loosening of the cell wall facilitates apoplastic transfer of sugars into the parasite. A reduction in xyloglucan in

the neighbouring phloem cells of the host was also observed in the same study. Some XET action was detected in the endophytic part of the haustorium in the present study (Fig. 9). Since *Cr-XTH-1* and *Cr-XTH-2* expression levels drop in the more advanced stages of haustoriogenesis, a full investigation of the expression patterns of all other *XTH* gene candidates that have been identified in the reference transcriptomes of both *Cuscuta* species will be necessary to reveal which of the genes take over the hypothetical task of modifying host xyloglucans.

Although the exact function of neither *Cr-XTH-2* nor *XTH1\_SLY* is known, their intriguing similarity (Fig. 7) gives rise to a bold train of thought where the infective mechanisms in parasites might not have evolved *de novo* but, rather, through re-purposing of defence pathways that existed already in their non-parasitic ancestors. A similar scenario was suggested as an explanation for similarities in the mutual recognition systems by pathogens and hosts (Vasta, 2012). *XTH1\_SLY* is expressed very strongly in expanding tomato fruits (Matas *et al.*, 2011) (see also Tomato eFP Browser, [http://bar.utoronto.ca/efp\\_tomato/cgi-bin/efpWeb.cgi](http://bar.utoronto.ca/efp_tomato/cgi-bin/efpWeb.cgi)), suggesting a role during fruit ripening. While this can be best reconciled with a molecular function in cell wall loosening, XTHs were also shown to have the opposite effect and can tighten cell walls (Maris *et al.*, 2009). In fact, the latter process would be expected to exist in the parasite to protect its walls from its own hydrolytic enzyme cocktail, but such details of the complex array of actions and reactions between *Cuscuta* and its hosts need to be addressed in future work.

Our observation that the expression of cell wall-related genes in *Cuscuta* was up-regulated at the onset of haustorium development is in agreement with other recent reports on gene expression in parasitic plants (Ranjan *et al.*, 2014; Yang *et al.*, 2014), which indicates that changes to cell walls are essential to the formation of the infection organ. Furthermore, the site-specific action of XTHs during host plant infection points towards the relevance of xyloglucan modification in host–*Cuscuta* interactions. Consequently, cell wall genes and *XTH* genes in particular might prove effective gene silencing targets for the control of *Cuscuta* in agriculture, and, as such, efforts to unravel the role of xyloglucan and its modifiers in haustorium development should be continued.

## Supplementary data

Supplementary data are available at *JXB* online.

**Supplementary Table S1.** Sequences of gene-specific primers with respective amplicon sizes and PCR efficiencies.

**Supplementary Table S2.** Gene expression levels in single biological replicates.

**Supplementary Table S3.** Mean gene expression levels of biological triplicates.

**Supplementary Fig. S1.** Melt peaks of qPCR amplicons.

**Supplementary Fig. S2.** Size separation of qPCR amplicons on agarose gel.

**Supplementary Fig. S3.** Stem elongation in the region just below the apical shoot tip.

**Supplementary Fig. S4.** XET action in FR light-induced haustoria.

**Supplementary Fig. S5.** Hydrolytic activity of a haustorial enzyme extract from *C. reflexa* towards xyloglucan.

## Acknowledgements

The generous gift of IgGs from pre-immune serum and immune serum against XTHs by Dr Emilia Labrador, Dr Berta Dopico, and Dr Ignacio Martín (University of Salamanca, Spain) is gratefully acknowledged. Ave Tooming-Klunderud is thanked for 454 pyro-sequencing. The sequencing service was provided by the Norwegian High-Throughput Sequencing Centre, a national technology platform supported by the ‘Functional Genomics’ and ‘Infrastructure’ programmes of the Research Council of Norway and the Southeastern Regional Health Authorities (<http://www.sequencing.uio.no>). We are indebted to the Phytotron staff at Holt (University of Tromsø, Norway), in particular Leidulf Lund, for the care and maintenance of our plants. Eli Robertsen is thanked for technical assistance in plasmid isolation. Dr Hanne R. Johnsen, Dr Karsten Fischer (University of Tromsø, Norway), and Anja Striberny are thanked for fruitful discussions and/or comments to the manuscript. The manuscript is part of the doctoral thesis of SO.

## References

- Alakonya A, Kumar R, Koenig D, et al.** 2012. Interspecific RNA interference of SHOOT MERISTEMLESS-like disrupts *Cuscuta pentagona* plant parasitism. *The Plant Cell* **24**, 3153–3166.
- Albert M, Werner M, Proksch P, Fry SC, Kaldenhoff R.** 2004. The cell wall-modifying xyloglucan endotransglycosylase/hydrolase LeXTH1 is expressed during the defence reaction of tomato against the plant parasite *Cuscuta reflexa*. *Plant Biology* **6**, 402–407.
- Altschul SF, Gish W, Miller W, Myers EW, Lipman DJ.** 1990. Basic local alignment search tool. *Journal of Molecular Biology* **215**, 403–410.
- Aly R.** 2007. Conventional and biotechnological approaches for control of parasitic weeds. *In Vitro Cellular and Developmental Biology-Plant* **43**, 304–317.
- Aly R.** 2013. Trafficking of molecules between parasitic plants and their hosts. *Weed Research* **53**, 231–241.
- Bar Nun N, Mayer AM.** 1999. Culture of pectin methylesterase and polyphenoloxidase in *Cuscuta campestris*. *Phytochemistry* **50**, 719–727.
- Battistuzzi G, Bellei M, Bortolotti CA, Sola M.** 2010. Redox properties of heme peroxidases. *Archives of Biochemistry and Biophysics* **500**, 21–36.
- Birnboim HC, Doly J.** 1979. A rapid alkaline extraction procedure for screening recombinant plasmid DNA. *Nucleic Acids Research* **7**, 1513–1523.
- Blanca JM, Pascual L, Ziarsolo P, Nuez F, Canizares J.** 2011. ngs\_backbone: a pipeline for read cleaning, mapping and SNP calling using next generation sequence. *BMC Genomics* **12**, 285.
- Bleischwitz M, Albert M, Fuchsbauer HL, Kaldenhoff R.** 2010. Significance of Cuscutain, a cysteine protease from *Cuscuta reflexa*, in host–parasite interactions. *BMC Plant Biology* **10**, 227.
- Borsics T, Lados M.** 2002. Dodder infection induces the expression of a pathogenesis-related gene of the family PR-10 in alfalfa. *Journal of Experimental Botany* **53**, 1831–1832.
- Chevreux B, Wetter T, Suhai S.** 1999. Genome sequence assembly using trace signals and additional sequence information. *Computer Science and Biology: Proceedings of the German Conference on Bioinformatics (GBC)* **99**, 45–56.
- Christensen NM, Dorr I, Hansen M, van der Kooij TA, Schulz A.** 2003. Development of *Cuscuta* species on a partially incompatible host: induction of xylem transfer cells. *Protoplasma* **220**, 131–142.
- Costea M, Garcia MA, Stefanovic S.** 2015. A phylogenetically based infrageneric classification of the parasitic plant genus *Cuscuta* (dodders, Convolvulaceae). *Systematic Botany* **40**, 269–285.
- Dawson JH, Musselman LJ, Wolswinkel P, Dorr I.** 1994. Biology and control of *Cuscuta*. *Reviews of Weed Science* **6**, 265–317.

- Dhugga KS, Tiwari SC, Ray PM.** 1997. A reversibly glycosylated polypeptide (RGP1) possibly involved in plant cell wall synthesis: purification, gene cloning, and trans-Golgi localization. Proceedings of the National Academy of Sciences, USA **94**, 7679–7684.
- Diatchenko L, Lau YF, Campbell AP, et al.** 1996. Suppression subtractive hybridization: a method for generating differentially regulated or tissue-specific cDNA probes and libraries. Proceedings of the National Academy of Sciences, USA **93**, 6025–6030.
- Duroux L, Welinder KG.** 2003. The peroxidase gene family in plants: a phylogenetic overview. Journal of Molecular Evolution **57**, 397–407.
- Finn RD, Bateman A, Clements J, et al.** 2014. Pfam: the protein families database. Nucleic Acids Research **42**, D222–D230.
- Frankova L, Fry SC.** 2013. Biochemistry and physiological roles of enzymes that ‘cut and paste’ plant cell-wall polysaccharides. Journal of Experimental Botany **64**, 3519–3550.
- Fry SC.** 1997. Novel ‘dot-blot’ assays for glycosyltransferases and glycosylhydrolases: optimization for xyloglucan endotransglycosylase (XET) activity. The Plant Journal **11**, 1141–1150.
- Furuhashi K, Tada Y, Okamoto K, Sugai M, Kubota M, Watanabe M.** 1997. Phytochrome participation in induction of haustoria in *Cuscuta japonica*, a holoparasitic flowering plant. Plant and Cell Physiology **38**, 935–940.
- Garcia MA, Costea M, Kuzmina M, Stefanovic S.** 2014. Phylogeny, character evolution, and biogeography of *Cuscuta* (dodders; Convolvulaceae) inferred from coding plastid and nuclear sequences. American Journal of Botany **101**, 670–690.
- Griffiths-Jones S, Moxon S, Marshall M, Khanna A, Eddy SR, Bateman A.** 2005. Rfam: annotating non-coding RNAs in complete genomes. Nucleic Acids Research **33**, D121–124.
- Ichihashi Y, Mutuku JM, Yoshida S, Shirasu K.** 2015. Transcriptomics exposes the uniqueness of parasitic plants. Briefings in Functional Genomics **14**, 275–282.
- Jiang L, Wijeratne AJ, Wijeratne S, Fraga M, Meulia T, Doohan D, Li Z, Qu F.** 2013. Profiling mRNAs of two *Cuscuta* species reveals possible candidate transcripts shared by parasitic plants. PLoS One **8**, e81389.
- Jimenez T, Martin I, Labrador E, Dopico B.** 2006. The immunolocalization of a xyloglucan endotransglucosylase/hydrolase specific to elongating tissues in *Cicer arietinum* suggests a role in the elongation of vascular cells. Journal of Experimental Botany **57**, 3979–3988.
- Johnsen HR, Striberny B, Olsen S, Vidal-Melgosa S, Fangel JU, Willats WG, Rose JK, Krause K.** 2015. Cell wall composition profiling of parasitic giant dodder (*Cuscuta reflexa*) and its hosts: *a priori* differences and induced changes. New Phytologist **207**, 805–816.
- Kaiser B, Vogg G, Furst UB, Albert M.** 2015. Parasitic plants of the genus *Cuscuta* and their interaction with susceptible and resistant host plants. Frontiers in Plant Science **6**, 45.
- Kim G, LeBlanc ML, Wafula EK, dePamphilis CW, Westwood JH.** 2014. Genomic-scale exchange of mRNA between a parasitic plant and its hosts. Science **345**, 808–811.
- Kim G, Westwood JH.** 2015. Macromolecule exchange in *Cuscuta*–host plant interactions. Current Opinion in Plant Biology **26**, 20–25.
- Kosik O, Farkas V.** 2008. One-pot fluorescent labeling of xyloglucan oligosaccharides with sulforhodamine. Analytical Biochemistry **375**, 232–236.
- Lamb C, Dixon RA.** 1997. The oxidative burst in plant disease resistance. Annual Review of Plant Physiology and Plant Molecular Biology **48**, 251–275.
- Langeveld SMJ, Vennik M, Kottenhagen M, van Wijk R, Buijk A, Kijne JW, de Pater S.** 2002. Glucosylation activity and complex formation of two classes of reversibly glycosylated polypeptides. Plant Physiology **129**, 278–289.
- Leblanc M, Kim G, Patel B, Stromberg V, Westwood J.** 2013. Quantification of tomato and *Arabidopsis* mobile RNAs trafficking into the parasitic plant *Cuscuta pentagona*. New Phytologist **200**, 1225–1233.
- Leblanc M, Kim G, Westwood JH.** 2012. RNA trafficking in parasitic plant systems. Frontiers in Plant Science **3**, 203.
- Li DM, Staehelin C, Zhang YS, Peng SL.** 2009. Identification of genes differentially expressed in *Mikania micrantha* during *Cuscuta campestris* infection by suppression subtractive hybridization. Journal of Plant Physiology **166**, 1423–1435.
- Li KB.** 2003. ClustalW-MPI: ClustalW analysis using distributed and parallel computing. Bioinformatics **19**, 1585–1586.
- Lohse M, Nagel A, Herter T, May P, Schroda M, Zrenner R, Tohge T, Fernie AR, Stitt M, Usadel B.** 2014. Mercator: a fast and simple web server for genome scale functional annotation of plant sequence data. Plant, Cell and Environment **37**, 1250–1258.
- Lopez-Curto L, Marquez-Guzman J, Diaz-Pontones DM.** 2006. Invasion of *Coffea arabica* (Linn.) by *Cuscuta jalapensis* (Schlecht): *in situ* activity of peroxidase. Environmental and Experimental Botany **56**, 127–135.
- Maris A, Suslov D, Fry SC, Verbelen JP, Vissenberg K.** 2009. Enzymic characterization of two recombinant xyloglucan endotransglucosylase/hydrolase (XTH) proteins of *Arabidopsis* and their effect on root growth and cell wall extension. Journal of Experimental Botany **60**, 3959–3972.
- Matas AJ, Yeats TH, Buda GJ, et al.** 2011. Tissue- and cell-type specific transcriptome profiling of expanding tomato fruit provides insights into metabolic and regulatory specialization and cuticle formation. The Plant Cell **23**, 3893–3910.
- Nagar R, Singh M, Sanwal GG.** 1984. Cell-wall degrading enzymes in *Cuscuta reflexa* and its hosts. Journal of Experimental Botany **35**, 1104–1112.
- Orr GL, Haidar MA, Orr DA.** 1996. Smallseed dodder (*Cuscuta planiflora*) phototropism toward far-red when in white light. Weed Science **44**, 233–240.
- Pfaffl MW.** 2001. A new mathematical model for relative quantification in real-time RT-PCR. Nucleic Acids Research **29**, e45.
- Quast C, Pruesse E, Yilmaz P, Gerken J, Schweer T, Yarza P, Peplies J, Glockner FO.** 2013. The SILVA ribosomal RNA gene database project: improved data processing and web-based tools. Nucleic Acids Research **41**, D590–D596.
- Ranjan A, Ichihashi Y, Farhi M, Zumstein K, Townsley B, David-Schwartz R, Sinha NR.** 2014. De novo assembly and characterization of the transcriptome of the parasitic weed *Cuscuta pentagona* identifies genes associated with plant parasitism. Plant Physiology **166**, 1186–1199.
- Rose JKC, Braam J, Fry SC, Nishitani K.** 2002. The XTH family of enzymes involved in xyloglucan endotransglucosylation and endohydrolysis: current perspectives and a new unifying nomenclature. Plant and Cell Physiology **43**, 1421–1435.
- Sagi G, Katz A, Guenoune-Gelbart D, Epel BL.** 2005. Class 1 reversibly glycosylated polypeptides are plasmodesmal-associated proteins delivered to plasmodesmata via the Golgi apparatus. The Plant Cell **17**, 1788–1800.
- Scheller HV, Ulvskov P.** 2010. Hemicelluloses. Annual Review of Plant Biology **61**, 263–289.
- Srivastava S, Nighojkar A, Kumar A.** 1994. Multiple forms of pectin methylesterase from *Cuscuta reflexa* filaments. Phytochemistry **37**, 1233–1236.
- Striberny B, Krause K.** 2015. Cell wall glycoproteins at interaction sites between parasitic giant dodder (*Cuscuta reflexa*) and its host *Pelargonium zonale*. Plant Signaling and Behavior (in press).
- Tada Y, Sugai M, Furuhashi K.** 1996. Haustoria of *Cuscuta japonica*, a holoparasitic flowering plant, are induced by the cooperative effects of far-red light and tactile stimuli. Plant and Cell Physiology **37**, 1049–1053.
- UniProt-Consortium.** 2015. UniProt: a hub for protein information. Nucleic Acids Research **43**, D204–D212.
- Usadel B, Nagel A, Thimm O, et al.** 2005. Extension of the visualization tool MapMan to allow statistical analysis of arrays, display of corresponding genes, and comparison with known responses. Plant Physiology **138**, 1195–1204.
- Van Sandt VST, Suslov D, Verbelen JP, Vissenberg K.** 2007. Xyloglucan endotransglucosylase activity loosens a plant cell wall. Annals of Botany **100**, 1467–1473.
- Vasta GR.** 2012. Galectins as pattern recognition receptors: structure, function, and evolution. Advances in Experimental Medicine and Biology **946**, 21–36.
- Vaughn KC.** 2002. Attachment of the parasitic weed dodder to the host. Protoplasma **219**, 227–237.
- Vaughn KC.** 2003. Dodder hyphae invade the host: a structural and immunocytochemical characterization. Protoplasma **220**, 189–200.
- Vaughn KC.** 2006. Conversion of the searching hyphae of dodder into xyllic and phloic hyphae: a cytochemical and immunocytochemical investigation. International Journal of Plant Sciences **167**, 1099–1114.

**Veitch NC.** 2004. Horseradish peroxidase: a modern view of a classic enzyme. *Phytochemistry* **65**, 249–259.

**Vidal-Melgosa S, Pedersen HL, Schuckel J, Arnal G, Dumon C, Amby DB, Monrad RN, Westereng B, Willats WG.** 2015. A new versatile microarray-based method for high throughput screening of carbohydrate-active enzymes. *Journal of Biological Chemistry* **290**, 9020–9036.

**Wan CY, Wilkins TA.** 1994. A modified hot borate method significantly enhances the yield of high-quality RNA from cotton (*Gossypium hirsutum* L.). *Analytical Biochemistry* **223**, 7–12.

**Yang Z, Wafula EK, Honaas LA, et al.** 2014. Comparative transcriptome analyses reveal core parasitism genes and suggest gene duplication and repurposing as sources of structural novelty. *Molecular Biology and Evolution* **32**, 767–790.
